# Supplementary material
Source: PubMed Central journal article supplement (PMC2921473)
Supplement: NIHMS206168-supplement-01.pdf [file NIHMS206168-supplement-01.pdf]

## **Supplement 1**

### **Supplemental Methods and Materials**

#### Description of Self-Report Psychological Measures

Subjects completed the following written self-report measures in advance of the scanning session: Childhood Trauma Questionnaire (CTQ; assessing childhood maltreatment) (1); Revised Conflict Tactics Scale (assessing the type and severity of intimate-partner violence; CTS-2) (2); PTSD Checklist-Civilian (PCL-C; assessing severity of PTSD symptoms) (3); Impact of Events Scale-Revised (IES-R; assessing responses to stressful life events) (4); and, Beck Depression Inventory (BDI; assessing severity of depression) (5).

**Table S1.** Neuroimaging Studies of Emotional-Face Processing in Posttraumatic Stress Disorder (PTSD)

| Study                                | Population                                                     | Paradigm                                       | Stimuli                           | Contrast            | Results                                                                                                                                                                    |
|--------------------------------------|----------------------------------------------------------------|------------------------------------------------|-----------------------------------|---------------------|----------------------------------------------------------------------------------------------------------------------------------------------------------------------------|
| Rauch <i>et al.</i> , 2000 (6)       | Combat trauma & Resilients                                     | Passive viewing w/ backwards masking           | Fearful, happy, and neutral faces | Fearful vs. happy   | ↑ activation in amygdala, symptom severity + correlated w/ amygdala activation                                                                                             |
| Armony <i>et al.</i> , 2005 (7)      | MVA, No controls                                               | Passive viewing w/ backwards masking           | Fearful, happy, and neutral faces | Masked vs. Unmasked | Amygdala + correlated with CAPS scores for masked faces, - for unmasked                                                                                                    |
| Shin <i>et al.</i> , 2005 (8)        | Mixed (Combat, firefighters) & Resilients                      | Passive viewing                                | Fearful, happy, and neutral faces | Fearful vs. happy   | ↑ Amygdala, ↓ rACC, vmPFC, dmPFC; Symptom severity – correlated w/ rACC activity                                                                                           |
| Williams <i>et al.</i> , 2006 (9)    | Mixed (MVA, Assault) & Controls                                | Passive viewing                                | Fearful and neutral faces         | Fearful vs. neutral | ↓ activation in mPFC/ACC and IPL, ↑ in dmPFC, amygdala, SPL, superior temporal, premotor cortex, and visual cortex                                                         |
| Felmingham <i>et al.</i> , 2007 (10) | Mixed (MVA, Assault), No controls                              | Passive viewing                                | Fearful and neutral faces         | Fearful vs. neutral | ↑ rACC activity post tx; change in CAPS + correlated w/ rACC activation and – with amygdala activation                                                                     |
| Kemp <i>et al.</i> , 2007 (11)       | Mixed (MVA and Assault); Comorbid depression vs. non-depressed | Passive viewing                                | Fearful and neutral faces         | Fearful vs. neutral | ↓ activation for PTSD-Dep in mPFC and amygdala compared to PTSD alone; ↑ right amygdala activation for PTSD vs. normals; ↓ left amygdala activity for PTSD-Dep vs. normals |
| Kim <i>et al.</i> , 2008 (12)        | Survivors of subway fire & Controls                            | Same-difference judgment w/ emotional conflict | Fearful and neutral faces         | Fearful vs. neutral | ↓ rACC activation, CAPS – correlated with deactivation in rACC                                                                                                             |

|                                      |                                                                   |                                              |                           |                     |                                                                                                                                                                                                                                                                                  |
|--------------------------------------|-------------------------------------------------------------------|----------------------------------------------|---------------------------|---------------------|----------------------------------------------------------------------------------------------------------------------------------------------------------------------------------------------------------------------------------------------------------------------------------|
| Bryant <i>et al.</i> , 2008 (13)     | Mixed (MVA, Assault) & Controls                                   | Passive viewing w/ backwards masking         | Fearful and neutral faces | Fearful vs. neutral | ↑ activation in amygdala and mPFC/ACC                                                                                                                                                                                                                                            |
| Bryant <i>et al.</i> , 2008 (14)     | Mixed (MVA, Assault) & Controls                                   | Passive viewing w/ backwards masking         | Fearful and neutral faces | Fearful vs. neutral | ↑ Bilateral amygdala, ↑Right rACC, poor improvement post-tx + associated w/ ventral ACC and amygdala activation                                                                                                                                                                  |
| Felmingham <i>et al.</i> , 2008 (15) | Mixed (MVA, Assault), No controls                                 | Passive viewing (conscious and nonconscious) | Fearful and neutral faces | Fearful vs. neutral | For conscious fear, non-dissociatives had ↑ activity in right SFG, MedFG, and IFG and left MFG, while dissociatives had ↑ activity in left vACC. For unconscious fear, dissociatives had ↑ activity in left pallidum, bilateral amygdalae, bilateral insulae, and left thalamus. |
| Kemp <i>et al.</i> , 2009 (16)       | Unspecified PTSD sample & Controls, High-SCR & Low-SCR responders | Passive viewing w/ backwards masking         | Fearful and neutral faces | Fearful vs. neutral | PTSD High-SCR had ↑ activation in brainstem, amygdala, and mPFC vs. PTSD Low-SCR; SCR + correlated w/ activity in thalamus, brainstem, amygdala, and mPFC; CAPS + correlated w/ activity in mPFC and bilateral amygdalae                                                         |

rACC, rostral anterior cingulate; vMFC, ventromedial prefrontal cortex; dmPFC, dorsomedial prefrontal cortex; IPL, inferior parietal lobule; SPL, superior parietal lobule; SFG, superior frontal gyrus; MedFG, medial frontal gyrus; IFG, inferior frontal gyrus; MFG, middle frontal gyrus; vACC, ventral anterior cingulate; MVA, motor vehicle accident; SCR, skin conductance response; CAPS, Clinician-Administered PTSD Scale

**Table S2.** Demographic and Self-Report Psychological Measure Statistics by Group

| Demographic/Psychological Variables                                                                                     | IPV-PTSD                                                                                              |       |        | Non-Traumatized Controls                                                                              |       |       | $t/\chi^2$ | $p$       |
|-------------------------------------------------------------------------------------------------------------------------|-------------------------------------------------------------------------------------------------------|-------|--------|-------------------------------------------------------------------------------------------------------|-------|-------|------------|-----------|
|                                                                                                                         | Mean                                                                                                  | SD    | Range  | Mean                                                                                                  | SD    | Range |            |           |
| Age (yrs)                                                                                                               | 35.40                                                                                                 | 8.60  | 24-49  | 37                                                                                                    | 6.49  | 27-50 | -.832      | <i>ns</i> |
| Education (yrs)                                                                                                         | 12.66                                                                                                 | 2.64  | 7-16   | 14.95                                                                                                 | 1.32  | 12-16 | -2.68      | <.05      |
| Marital Status<br>Married/living w/ partner<br>Never married<br>Separated/divorced                                      | <i>n</i> =0<br><i>n</i> =5<br><i>n</i> =7                                                             |       |        | <i>n</i> =3<br><i>n</i> =8<br><i>n</i> =1                                                             |       |       | 6.250      | <.05      |
| Race<br>African-American<br>Asian-American<br>Caucasian<br>Filipino-American<br>Hispanic<br>Mexican-American<br>Other   | <i>n</i> =3<br><i>n</i> =0<br><i>n</i> =7<br><i>n</i> =0<br><i>n</i> =2<br><i>n</i> =0<br><i>n</i> =0 |       |        | <i>n</i> =1<br><i>n</i> =0<br><i>n</i> =6<br><i>n</i> =1<br><i>n</i> =0<br><i>n</i> =1<br><i>n</i> =3 |       |       | 4.50       | <i>ns</i> |
| Comorbid Diagnosis (lifetime or current)<br>Major Depressive Disorder<br>Generalized Anxiety Disorder<br>Panic Disorder | <i>n</i> =7<br><i>n</i> =4<br><i>n</i> =3                                                             |       |        | --                                                                                                    |       |       |            |           |
| Clinician Administered PTSD Scale Total (CAPS)                                                                          | 71                                                                                                    | 25.34 | 30-110 | --                                                                                                    | --    | --    | N/A        | N/A       |
| Conflict Tactics Scale Revised (CTS-2) Total                                                                            | 272.4                                                                                                 | 253.0 | 0-873  | 44.09                                                                                                 | 42.08 | 0-125 | 2.953      | <.01      |
| Negotiation Subscale                                                                                                    | 30.36                                                                                                 | 26.91 | 0-81   | 44.22                                                                                                 | 42.44 | 0-125 | -.889      | <i>ns</i> |
| Psychological Aggression Subscale                                                                                       | 93.36                                                                                                 | 58.04 | 0-177  | 2.9                                                                                                   | 6.19  | 0-19  | 4.892      | <.001     |
| Physical Assault Subscale                                                                                               | 78.82                                                                                                 | 96.45 | 0-290  | 0.1                                                                                                   | 0.32  | 0-1   | 2.575      | <.05      |
| Sexual Coercion Subscale                                                                                                | 36.64                                                                                                 | 53.94 | 0-175  | 0                                                                                                     | 0     | 0     | 2.027      | <i>ns</i> |

|                                              |       |       |       |       |      |       |       |           |
|----------------------------------------------|-------|-------|-------|-------|------|-------|-------|-----------|
| Injury Subscale                              | 33.27 | 44.20 | 0-150 | 0.2   | 0.63 | 0-2   | 2.360 | <.05      |
| Childhood Trauma Questionnaire (CTQ) Total   | 64.73 | 4.47  | 55-72 | 64.58 | 4.05 | 58-69 | .081  | <i>ns</i> |
| Impact of Events Scale-Revised (IES-R) Total | 45.55 | 20.60 | 10-69 | 0     | 0    | 0     | 6.60  | <.001     |
| Avoidance Subscale                           | 18    | 6.85  | 7-28  | 0     | 0    | 0     | 7.837 | <.001     |
| Hyperarousal Subscale                        | 11.82 | 6.66  | 0-19  | 0     | 0    | 0     | 5.598 | <.001     |
| Intrusions Subscale                          | 15.72 | 8.02  | 1-25  | 0     | 0    | 0     | 6.182 | <.001     |
| Beck Depression Inventory-2 (BDI-2) Total    | 16.75 | 11.01 | 4-41  | 1.83  | 2.40 | 0-6   | 4.584 | <.001     |
| PTSD Checklist Civilian (PCL-C) Total        | 64.83 | 11.36 | 45-77 |       |      |       |       |           |
| Re-experiencing Subscale                     | 18.17 | 4.30  | 9-24  | --    | --   | --    | N/A   | N/A       |
| Avoidance/Numbing Subscale                   | 26.50 | 6.77  | 12-35 |       |      |       |       |           |
| Hyperarousal Subscale                        | 20.17 | 3.38  | 14-25 |       |      |       |       |           |

*ns*, not significant; N/A, not applicable

**Table S3.** Behavioral Data From Emotional-Face Matching Task

| Trial Type    | Reaction Time (ms) |        |                 |          |           | % of Trials Incorrect |      |         |          |           |
|---------------|--------------------|--------|-----------------|----------|-----------|-----------------------|------|---------|----------|-----------|
|               | Mean               | SD     | Range           | <i>t</i> | <i>p</i>  | Mean                  | SD   | Range   | <i>t</i> | <i>p</i>  |
| Angry Faces   |                    |        |                 |          |           |                       |      |         |          |           |
| IPV-PTSD      | 1695.01            | 510.62 | 1068.83-2609.0  | .796     | <i>ns</i> | 5.67                  | 5.72 | 0-15.38 | .729     | <i>ns</i> |
| NTC           | 1532.90            | 466.50 | 1020.18-2559.58 |          |           | 3.24                  | 9.61 | 0-33.33 |          |           |
| Fearful Faces |                    |        |                 |          |           |                       |      |         |          |           |
| IPV-PTSD      | 1923.24            | 569.33 | 1221.71-3151.95 | .647     | <i>ns</i> | 7.35                  | 8.76 | 0-22.22 | .989     | <i>ns</i> |
| NTC           | 1780.99            | 484.59 | 1237.09-2681.31 |          |           | 4.14                  | 6.74 | 0-22.22 |          |           |
| Happy Faces   |                    |        |                 |          |           |                       |      |         |          |           |
| IPV-PTSD      | 1355.70            | 306.53 | 876.85-1967.69  | .523     | <i>ns</i> | 1.01                  | 3.35 | 0-11.11 | 1.047    | <i>ns</i> |
| NTC           | 1293.13            | 267.38 | 1027.25-1838.60 |          |           | 0                     | 0    | 0       |          |           |
| Shapes        |                    |        |                 |          |           |                       |      |         |          |           |
| IPV-PTSD      | 1061.06            | 271.10 | 735.88-1530.51  | .709     | <i>ns</i> | .479                  | 1.58 | 0-5.26  | -1.48    | <i>ns</i> |
| NTC           | 999.29             | 127.88 | 733.78-1237.83  |          |           | 3.91                  | 7.52 | 0-25    |          |           |

*ns*, not significant; IPV-PTSD, intimate-partner violence posttraumatic stress disorder; NTC, non-traumatized controls

**Table S4.** Task-Dependent Activations for Matching to a Fearful vs. Happy Target Face Across All Participants. Cluster coordinates and anatomical areas are for cluster center of mass as defined by Talairach stereotactic space; Negative (-) signs following anatomical area indicate a relative deactivation; Descriptors for ACC and insula clusters do not reflect stereotactic distinctions, but are estimates based upon the relative location of activation on the group map.

| Analysis | Side | Anatomical Area          | Size ( $\mu$ l) | X     | Y     | Z     | Voxelwise Statistics: Mean (SD) |             |
|----------|------|--------------------------|-----------------|-------|-------|-------|---------------------------------|-------------|
|          |      |                          |                 |       |       |       | <i>t</i>                        | <i>p</i>    |
| ROI      | B    | Dorsal ACC               | 2048            | 7.5   | 30.4  | 20.3  | 2.647 (0.45)                    | .020 (.016) |
| ROI      | R    | Insula (m)               | 1472            | 39.8  | 5.1   | 14.1  | 3.286 (0.63)                    | .007 (.008) |
| ROI      | R    | Insula (a)               | 1088            | 33.1  | 18.1  | -0.7  | 2.529 (0.43)                    | .025 (.015) |
| ROI      | B    | Medial Frontal Gyrus (-) | 640             | -3.3  | 49.9  | -2.2  | -2.560 (0.39)                   | .023 (.017) |
| ROI      | L    | Insula (a)               | 512             | -30.7 | 21    | 0.8   | 2.480 (0.31)                    | .025 (.014) |
| ROI      | R    | Insula (p) (-)           | 384             | 37.8  | -24.5 | 13.9  | -2.277 (0.14)                   | .033 (.009) |
| ROI      | L    | Insula (a)               | 320             | -41.2 | 15    | 10.5  | 2.510 (0.25)                    | .021 (.009) |
| ROI      | R    | Amygdala                 | 192             | 25.3  | -5    | -20   | 2.347 (0.16)                    | .028 (.009) |
| WB       | R    | Fusiform Gyrus           | 14784           | 43.3  | -54.8 | -17.8 | 2.625 (0.46)                    | .021 (.014) |
| WB       | R    | Inferior Frontal Gyrus   | 10816           | 44    | 12.4  | 18.8  | 2.817 (0.53)                    | .016 (.013) |
| WB       | R    | Thalamus                 | 9600            | 3.8   | -16.0 | 0.2   | 2.799 (0.58)                    | .017 (.015) |
| WB       | L    | Declive                  | 9536            | -35.3 | -64.8 | -19.9 | 2.637 (0.39)                    | .019 (.013) |
| WB       | R    | Insula (a)               | 4532            | 27.9  | 16.4  | -2.4  | 2.551 (0.37)                    | .022 (.014) |
| WB       | L    | Inferior Frontal Gyrus   | 4032            | -39.5 | 25.4  | 13.0  | 2.513 (0.39)                    | .020 (.013) |
| WB       | L    | Supramarginal Gyrus      | 3776            | -29.1 | -58.3 | 32.0  | 2.626 (0.45)                    | .027 (.014) |
| WB       | R    | Middle Temporal Gyrus    | 3648            | 35.2  | -60.9 | 27.4  | 2.563 (0.43)                    | .023 (.014) |
| WB       | R    | Dorsal ACC               | 3072            | 6.7   | 30.5  | 24.2  | 2.661 (0.47)                    | .020 (.014) |
| WB       | R    | Dorsal ACC               | 2688            | 3.2   | 11.1  | 39.4  | 2.747 (0.53)                    | .018 (.014) |
| WB       | L    | Precentral Gyrus         | 2624            | -29.3 | 1.3   | 36.4  | 2.612 (0.45)                    | .022 (.015) |
| WB       | R    | Posterior Cingulate (-)  | 1984            | 2.7   | -36.0 | 37.4  | -2.865 (0.60)                   | .015 (.014) |
| WB       | L    | Middle Frontal Gyrus     | 1280            | -30.1 | 17.3  | 23.8  | 2.647 (0.39)                    | .019 (.013) |
| WB       | L    | Medial Frontal Gyrus (-) | 1152            | -10.7 | 66.0  | 10.7  | -2.331 (0.26)                   | .033 (.013) |

|    |   |                            |      |      |       |       |               |             |
|----|---|----------------------------|------|------|-------|-------|---------------|-------------|
| WB | R | Precuneus                  | 1088 | 17.7 | -74.8 | 34.5  | 2.451 (0.24)  | .025 (.012) |
| WB | R | Middle Frontal Gyrus       | 1024 | 29.1 | -10.3 | 39.9  | 2.802 (0.39)  | .014 (.011) |
| WB | L | Medial Frontal Gyrus (-)   | 832  | -1.9 | 50.5  | -3.6  | -2.613 (0.38) | .020 (.016) |
| WB | L | Superior Frontal Gyrus (-) | 832  | -6.3 | 55.9  | 29.1  | -2.474 (0.28) | .025 (.013) |
| WB | L | Pyramis                    | 768  | -8.4 | -76.6 | -24.1 | 2.557 (0.37)  | .021 (.011) |

ROI, region of interest; WB, whole brain; L, left; R, right; B, both; ACC, anterior cingulate; m, middle insula; a, anterior insula; p, posterior insula.



**Table S5.** Task-Dependent Activations for Matching to an Angry vs. Happy Target Face Across All Participants. Cluster coordinates and anatomical areas are for cluster center of mass as defined by Talairach stereotactic space; Negative (-) signs following anatomical area indicate a relative deactivation; Descriptors for ACC clusters do not reflect stereotactic distinctions, but are estimates based upon the relative location of activation on the group map.

| Analysis | Side | Anatomical Area          | Size ( $\mu$ l) | X     | Y     | Z     | Voxelwise Statistics: Mean (SD) |             |
|----------|------|--------------------------|-----------------|-------|-------|-------|---------------------------------|-------------|
|          |      |                          |                 |       |       |       | <i>t</i>                        | <i>p</i>    |
| ROI      | R    | Dorsal ACC               | 448             | 10.8  | 25.1  | 23.5  | 2.973 (0.31)                    | .008 (.005) |
| WB       | L    | Precuneus                | 2176            | -25.8 | -67.0 | 32.7  | 2.774 (0.53)                    | .017 (.014) |
| WB       | R    | Middle Frontal Gyrus     | 1536            | 27.3  | -11.1 | 40.9  | 2.712 (0.43)                    | .018 (.014) |
| WB       | R    | Inferior Frontal Gyrus   | 1472            | 41.6  | 5.1   | 23.7  | 2.466 (0.28)                    | .024 (.013) |
| WB       | L    | Middle Frontal Gyrus     | 1344            | -28.5 | -9    | 40.3  | 2.671 (0.43)                    | .019 (.016) |
| WB       | R    | Inferior Frontal Gyrus   | 1088            | 34.6  | 33.2  | 13.4  | 2.645 (0.47)                    | .021 (.015) |
| WB       | R    | Angular Gyrus            | 832             | 30.3  | -54.4 | 33.1  | 2.643 (0.41)                    | .019 (.012) |
| WB       | R    | Dorsal ACC               | 832             | 6.3   | 12.2  | 41.5  | 2.473 (0.34)                    | .026 (.014) |
| WB       | L    | Culmen (-)               | 768             | -5.4  | -42   | -21.1 | -2.561 (0.28)                   | .020 (.009) |
| WB       | L    | Thalamus                 | 768             | -18.3 | -27.1 | 1.1   | 2.902 (0.53)                    | .014 (.014) |
| WB       | R    | Middle Frontal Gyrus (-) | 704             | 31.8  | 59.5  | 8.1   | -2.461 (0.37)                   | .027 (.017) |

See Table S4 for abbreviations.

**Table S6.** Task-Dependent Activations for Matching to a Male vs. Female Target Face Across All Participants. Cluster coordinates and anatomical areas are for cluster center of mass as defined by Talairach stereotactic space; Negative (-) signs following anatomical area indicate a relative deactivation; Descriptors for ACC and insula clusters do not reflect stereotactic distinctions, but are estimates based upon the relative location of activation on the group map.

| Analysis | Side | Anatomical Area              | Size ( $\mu$ l) | X     | Y     | Z     | Voxelwise Statistics: Mean (SD) |             |
|----------|------|------------------------------|-----------------|-------|-------|-------|---------------------------------|-------------|
|          |      |                              |                 |       |       |       | <i>t</i>                        | <i>p</i>    |
| ROI      | R    | Insula (p)                   | 704             | 51.1  | -32.1 | 18.8  | 2.621 (0.46)                    | .021 (.014) |
| ROI      | L    | Insula (m)                   | 384             | -37.4 | 5.5   | 14.0  | 2.477 (0.17)                    | .022 (.007) |
| WB       | L    | Postcentral Gyrus            | 8768            | -29.3 | -23.1 | 41.0  | 2.754 (0.49)                    | .017 (.013) |
| WB       | R    | Superior Temporal Gyrus      | 6976            | 45.6  | 17.4  | -11.9 | 2.657 (0.46)                    | .020 (.014) |
| WB       | R    | Supramarginal Gyrus          | 6784            | 32    | -52.9 | 33.4  | 2.921 (0.60)                    | .014 (.012) |
| WB       | R    | Fusiform Gyrus               | 4544            | 38.2  | -67.4 | -11.9 | 2.584 (1.34)                    | .023 (.014) |
| WB       | L    | Precuneus                    | 3904            | -26.8 | -55.9 | 31.4  | 2.783 (0.58)                    | .018 (.015) |
| WB       | L    | Lentiform Nucleus            | 3840            | -18.6 | -2.1  | -0.6  | 2.737 (0.43)                    | .017 (.012) |
| WB       | R    | Middle Frontal Gyrus         | 3712            | 29.7  | -10.8 | 38.8  | 2.957 (0.68)                    | .014 (.013) |
| WB       | R    | Substantia Nigra             | 3200            | 9.6   | -13.8 | -10.8 | 2.666 (0.49)                    | .020 (.015) |
| WB       | L    | Cerebellar Tonsil            | 2944            | -5.4  | -55.2 | -36.8 | 2.587 (0.48)                    | .023 (.014) |
| WB       | R    | Middle Temporal Gyrus        | 2816            | 52.3  | -35.1 | -4.2  | 2.682 (0.54)                    | .020 (.013) |
| WB       | L    | Inferior Frontal Gyrus       | 2752            | -28.2 | 25    | -14.9 | 2.583 (0.39)                    | .021 (.014) |
| WB       | L    | Insula (a)                   | 2304            | -34.6 | 25    | 18.3  | 2.602 (0.47)                    | .023 (.015) |
| WB       | L    | Inferior Frontal Gyrus       | 2304            | -42.4 | 1.1   | 25.9  | 2.549 (0.52)                    | .026 (.017) |
| WB       | L    | Dorsal ACC                   | 1856            | -19   | 11.4  | 33.7  | 2.601 (0.44)                    | .022 (.014) |
| WB       | L    | Superior Frontal Gyrus (-)   | 1600            | -15.5 | 41.8  | 42.7  | -2.457 (0.21)                   | .024 (.011) |
| WB       | R    | Superior Temporal Gyrus      | 1280            | 52.6  | -30   | 17.2  | 2.441 (0.39)                    | .028 (.014) |
| WB       | R    | Middle Frontal Gyrus         | 1216            | 31.9  | 12.6  | 23.4  | 2.579 (0.35)                    | .021 (.013) |
| WB       | L    | Inferior Frontal Gyrus       | 1088            | -43.6 | 20.4  | -1.5  | 2.726 (0.44)                    | .017 (.015) |
| WB       | L    | Superior Occipital Gyrus (-) | 896             | -35.4 | -80.7 | 26.6  | -2.633 (0.46)                   | .022 (.018) |

|    |   |                        |     |       |       |       |              |             |
|----|---|------------------------|-----|-------|-------|-------|--------------|-------------|
| WB | L | Tuber                  | 768 | -37.5 | -69.4 | -26.2 | 2.631 (0.35) | .019 (.014) |
| WB | L | Insula (m)             | 768 | -33.7 | 5.3   | 17.4  | 2.328 (0.21) | .031 (.012) |
| WB | L | Middle Occipital Gyrus | 704 | -27.1 | -78.7 | 2.7   | 2.650 (0.37) | .018 (.011) |

See Table S4 for abbreviations.

**Table S7.** Task-Dependent Connectivity Across All Participants for Matching to a Fearful vs. Happy Target Face. Cluster coordinates and anatomical areas are for cluster center of mass as defined by Talairach stereotactic space; Negative (-) signs following anatomical area indicate a relative decoupling; Descriptors for ACC and insula clusters do not reflect stereotactic distinctions, but are estimates based upon the relative location of activation on the group map.

| Seed ROI       | Side | Connection ROI     | Size ( $\mu$ l) | X     | Y     | Z     | Voxelwise Statistics: Mean (SD) |             |
|----------------|------|--------------------|-----------------|-------|-------|-------|---------------------------------|-------------|
|                |      |                    |                 |       |       |       | <i>t</i>                        | <i>p</i>    |
| Dorsal ACC     | L    | Ventral ACC (-)    | 896             | -5.9  | 35.4  | 1.4   | -2.861 (.488)                   | .013 (.011) |
|                | L    | Insula (p) (-)     | 896             | -31.5 | -24.2 | 14.2  | -2.478 (.303)                   | .024 (.013) |
|                | R    | Ventral ACC (-)    | 832             | 6     | 39.1  | -1.6  | -2.500 (.309)                   | .024 (.014) |
|                | L    | Insula (a) (-)     | 448             | -34.1 | 19.5  | 3.7   | -2.519 (.256)                   | .022 (.013) |
|                | L    | Amygdala (-)       | 320             | -18.6 | -6.9  | -11.6 | -2.303 (.291)                   | .034 (.015) |
|                | L    | Insula (m) (-)     | 320             | -41.3 | -12.4 | -6.4  | -2.536 (.176)                   | .019 (.007) |
|                | L    | Insula (m) (-)     | 320             | -42   | -5    | 10.1  | -2.308 (.238)                   | .033 (.014) |
|                | L    | Amygdala (-)       | 320             | -30   | -3.3  | -15   | -2.971 (.952)                   | .017 (.015) |
| Left Insula    | R    | Perigenual ACC (-) | 768             | 4.9   | 34.7  | 13    | -2.461 (.311)                   | .026 (.013) |
|                | R    | Ventral ACC (-)    | 448             | 3.9   | 42.6  | -0.7  | -2.644 (.494)                   | .019 (.011) |
|                | L    | Amygdala (-)       | 384             | -26   | -4.3  | -15.3 | -2.730 (.605)                   | .019 (.015) |
|                | R    | Insula (a) (-)     | 320             | -31.6 | 18.4  | -0.5  | -2.505 (.195)                   | .021 (.007) |
| Left Insula    | L    | Insula (p) (-)     | 576             | -36   | -5.9  | 16    | -2.476 (.202)                   | .022 (.009) |
| Right Amygdala | R    | Amygdala (-)       | 384             | 23.9  | -5    | -20.1 | -2.524 (.328)                   | .023 (.012) |
|                | L    | Amygdala (-)       | 192             | -26   | -6.4  | -17.3 | -2.502 (.123)                   | .020 (.005) |

See Table S4 for abbreviations.

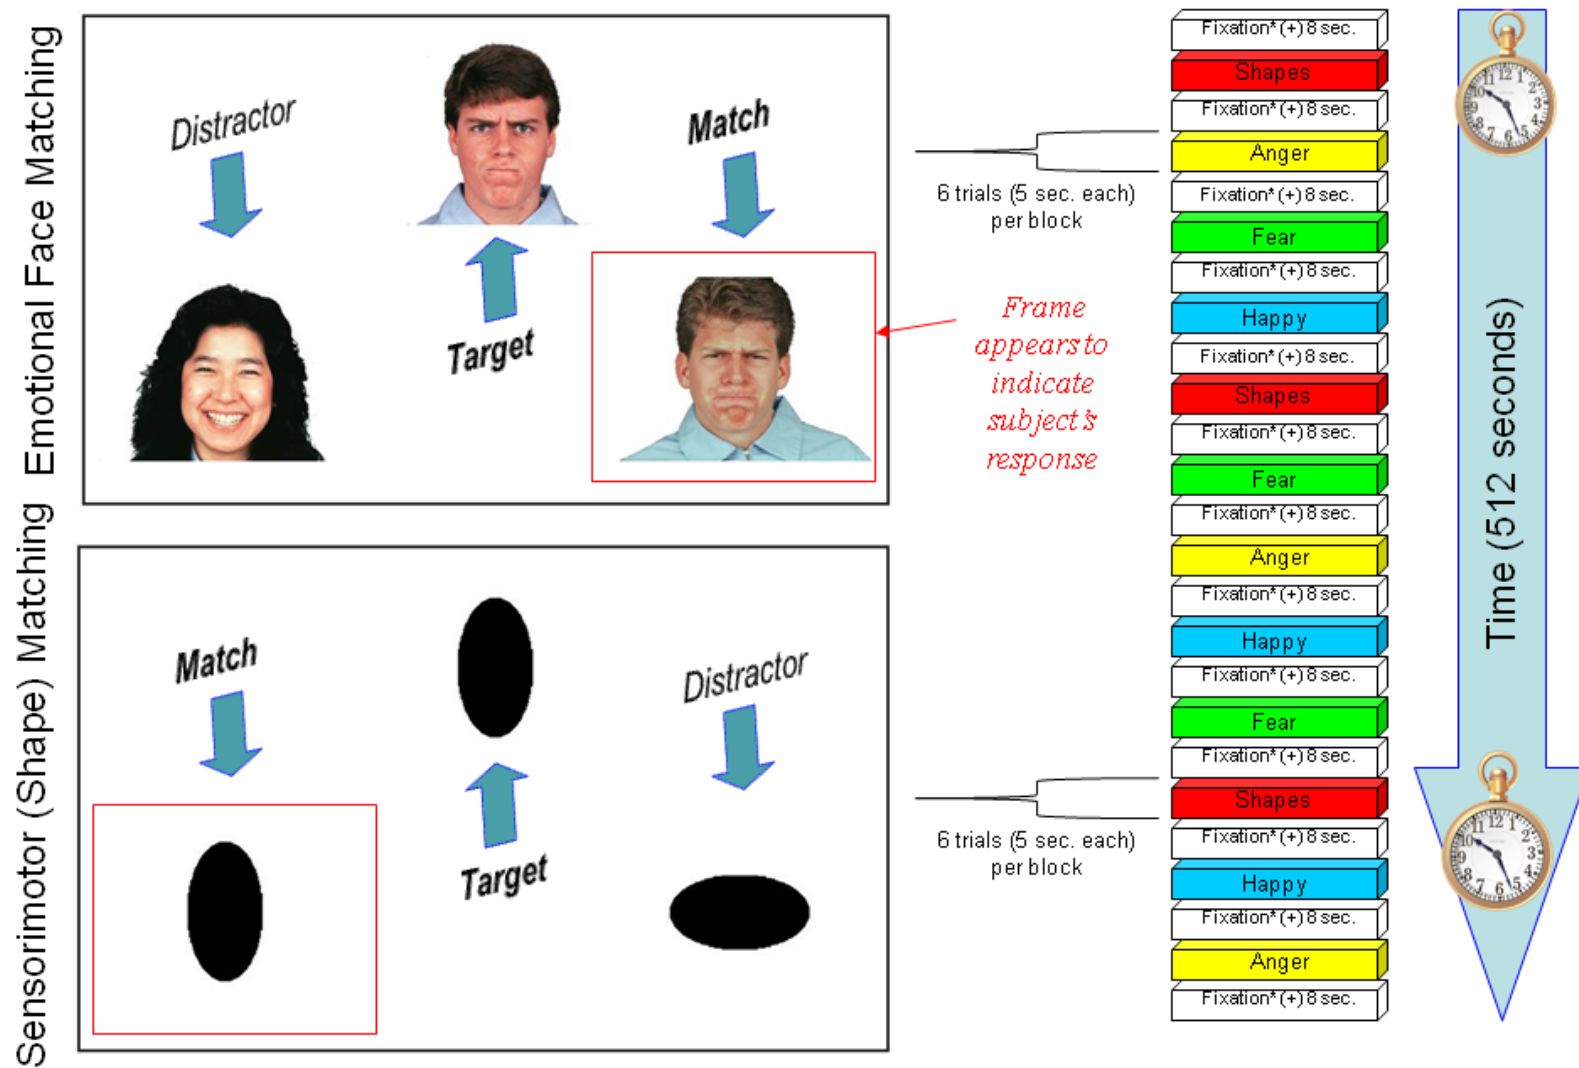

**Figure S1.** Modified Emotion Face Assessment Task. \*Task was modified through addition of happy target face trials to allow for isolation of threat-related emotion. Facial images reprinted with permission from (17).

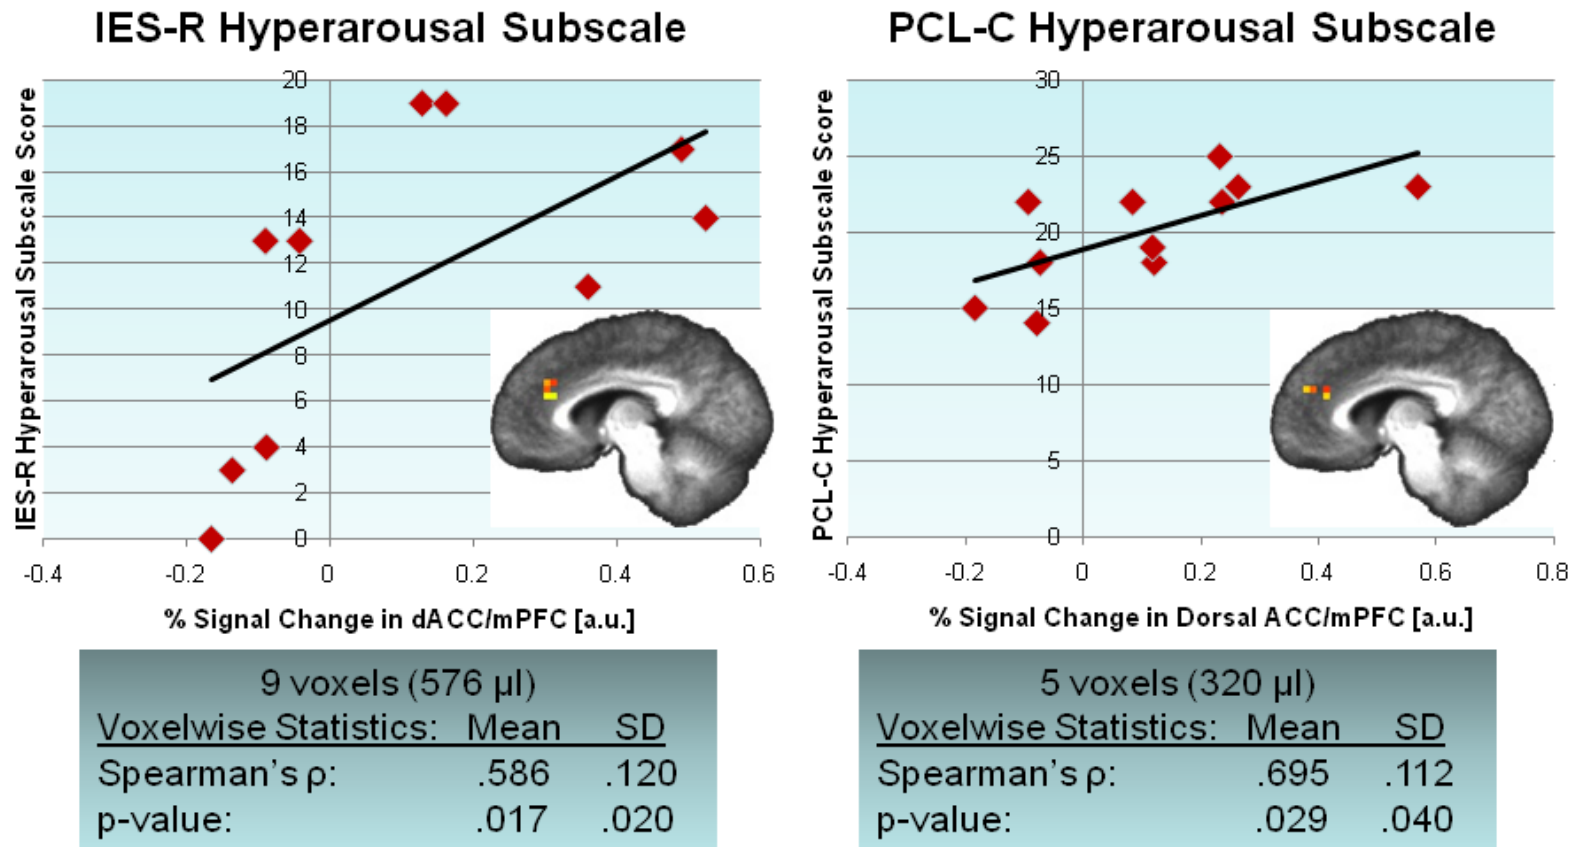

**Figure S2.** Hyperarousal-Associated Hyperactivation in Dorsal ACC/mPFC in IPV-PTSD Group for Matching to a Male vs. Female Target. Scatterplots depict scale by activity relationships for most representative voxel in each cluster (closest to mean). Voxelwise statistics for each cluster are displayed below.

1. Bernstein DP, Stein JA, Newcomb MD, Walker E, Pogge D, Ahluvalia T, *et al.* (2003): Development and validation of a brief screening version of the Childhood Trauma Questionnaire. *Child Abuse Negl* 27:169-190.
2. Straus MA, Hamby SL, Boney-McCoy S, Sugarman DB (1996): The revised Conflict Tactics Scales (CTS2): Development and preliminary psychometric data. *J Fam Issues* 17:283-316.
3. Weathers F, Litz B, Herman D, Huska J, Keane T (2003): The PTSD Checklist (PCL): Reliability, Validity, and Diagnostic Utility.
4. Horowitz MJ, Wilner N, Alvarez W (1979): Impact of Event Scale: A measure of subjective stress. *Psychosom Med* 41:209-218.
5. Beck AT, Ward CH, Mendelson M, Mock J, Erbaugh J (1961): An inventory for measuring depression. *Arch Gen Psychiatry* 4:561-571.
6. Rauch SL, Whalen PJ, Shin LM, McInerney SC, Macklin ML, Lasko NB, *et al.* (2000): Exaggerated amygdala response to masked facial stimuli in posttraumatic stress disorder: a functional MRI study. *Biol Psychiatry* 47:769-776.
7. Armony JL, Corbo V, Clement MH, Brunet A (2005): Amygdala response in patients with acute PTSD to masked and unmasked emotional facial expressions. *Am J Psychiatry* 162:1961-1963.
8. Shin LM, Wright CI, Cannistraro PA, Wedig MM, McMullin K, Martis B, *et al.* (2005): A functional magnetic resonance imaging study of amygdala and medial prefrontal cortex responses to overtly presented fearful faces in posttraumatic stress disorder. *Arch Gen Psychiatry* 62:273-281.
9. Williams LM, Kemp AH, Felmingham K, Barton M, Olivieri G, Peduto A, *et al.* (2006): Trauma modulates amygdala and medial prefrontal responses to consciously attended fear. *Neuroimage* 29:347-357.
10. Felmingham K, Kemp A, Williams L, Das P, Hughes G, Peduto A, *et al.* (2007): Changes in anterior cingulate and amygdala after cognitive behavior therapy of posttraumatic stress disorder. *Psychol Sci* 18:127-129.
11. Kemp AH, Felmingham K, Das P, Hughes G, Peduto AS, Bryant RA, *et al.* (2007): Influence of comorbid depression on fear in posttraumatic stress disorder: an fMRI study. *Psychiatry Res* 155:265-269.
12. Kim MJ, Chey J, Chung A, Bae S, Khang H, Ham B, *et al.* (2008): Diminished rostral anterior cingulate activity in response to threat-related events in posttraumatic stress disorder. *J Psychiatr Res* 42:268-277.
13. Bryant RA, Kemp AH, Felmingham KL, Liddell B, Olivieri G, Peduto A, *et al.* (2008): Enhanced amygdala and medial prefrontal activation during nonconscious processing of fear in posttraumatic stress disorder: an fMRI study. *Hum Brain Mapp* 29:517-523.

14. Bryant RA, Felmingham K, Kemp A, Das P, Hughes G, Peduto A, *et al.* (2008): Amygdala and ventral anterior cingulate activation predicts treatment response to cognitive behaviour therapy for post-traumatic stress disorder. *Psychol Med* 38:555-561.
15. Felmingham K, Kemp AH, Williams L, Falconer E, Olivieri G, Peduto A, *et al.* (2008): Dissociative responses to conscious and non-conscious fear impact underlying brain function in post-traumatic stress disorder. *Psychol Med* 38:1771-1780.
16. Kemp AH, Felmingham KL, Falconer E, Liddell BJ, Bryant RA, Williams LM (2009): Heterogeneity of non-conscious fear perception in posttraumatic stress disorder as a function of physiological arousal: an fMRI study. *Psychiatry Res* 174:158-161.
17. Matsumoto D, Ekman P (1998) Japanese and Caucasian facial expressions of emotion (JACFEE) and neutral faces (JACNeuF). San Francisco: San Francisco State University.
